# Supplementary material for: Conversion of carbon dioxide to a novel molecule NCNBO− mediated by NbBN2− anions at room temperature
Source: Royal Society of Chemistry journal article supplement (doi:10.1039/d1cp03613k), 2021-01-01
Supplement: d1cp03613k1.pdf [file d1cp03613k1.pdf]

# Supporting Information

## Conversion of Carbon Dioxide to A Novel Molecule NCNBO<sup>-</sup> Mediated by NbBN<sub>2</sub><sup>-</sup> Anions at Room Temperature

Lan-Ye Chu<sup>1</sup>, Ming Wang<sup>1</sup>, Jia-Bi Ma<sup>1\*</sup>

<sup>1</sup>Key Laboratory of Cluster Science of Ministry of Education, Beijing Key Laboratory of Photoelectronic/Electrophotonic Conversion Materials, School of Chemistry and Chemical Engineering, Beijing Institute of Technology, Beijing 102488, China

### Corresponding Author

\*Jia-Bi Ma, Email: majiabi@bit.edu.cn

### Contents

1. Additional time-of-flight (TOF) mass spectra. (Pages S3-4, S7)
2. Additional density functional theory results. (Pages S2, S5-S7, S8)
3. References. (Page S9)

**Table S1.** DFT-calculated and experimental bond dissociation energies. The values are in unit of eV.

| <div>Method</div> <div>EXP.</div> |            | N–C         | Nb–O        | Nb–C        | O–C          | B–O         | N–B         | $\sigma^1$  |
|-----------------------------------|------------|-------------|-------------|-------------|--------------|-------------|-------------|-------------|
|                                   |            | 7.76        | 8.00        | 5.90        | 11.16        | 8.38        | 3.92        |             |
|                                   |            | $\pm 0.03$  | $\pm 0.26$  | $\pm 0.13$  | $\pm 0.004$  | $\pm 0.22$  | $\pm 0.09$  |             |
| References                        |            | 1           | 2           | 3           | 4            | 2           | 5           |             |
| Hybrid Functionals                | B1B95      | 7.42        | 7.46        | 5.07        | 11.03        | 8.31        | 4.51        | 0.50        |
|                                   | B1LYP      | 7.25        | 7.38        | 4.92        | 10.70        | 8.12        | 4.53        | 0.61        |
|                                   | B3LYP      | 7.51        | 7.63        | 5.15        | 10.94        | 8.33        | 4.69        | 0.49        |
|                                   | B3P86      | 7.74        | 7.73        | 5.26        | 11.20        | 8.57        | 4.87        | 0.49        |
|                                   | B3PW91     | 7.49        | 7.45        | 4.98        | 10.95        | 8.38        | 4.68        | 0.56        |
|                                   | M05        | 7.54        | 7.57        | 6.22        | 11.02        | 8.07        | 4.36        | 0.33        |
|                                   | M052X      | 7.24        | 7.02        | 5.01        | 10.99        | 8.52        | 4.41        | 1.32        |
|                                   | PBE1PBE    | 7.48        | 7.37        | 4.98        | 10.95        | 8.36        | 4.69        | 0.57        |
|                                   | X3LYP      | 7.49        | 7.62        | 5.14        | 10.93        | 8.32        | 4.69        | 0.49        |
|                                   | <b>M06</b> | <b>7.48</b> | <b>7.84</b> | <b>5.98</b> | <b>11.11</b> | <b>8.31</b> | <b>4.58</b> | <b>0.31</b> |
|                                   | M062X      | 7.38        | 7.49        | 5.50        | 11.09        | 8.58        | 4.66        | 1.22        |
|                                   | BH&HLYP    | 6.55        | 6.62        | 4.27        | 10.21        | 8.14        | 4.12        | 1.71        |
|                                   | BMK        | 7.40        | 7.03        | 4.44        | 11.24        | 8.55        | 4.77        | 0.81        |
| Pure Functionals                  | BPW91      | 8.05        | 8.02        | 5.45        | 11.30        | 8.71        | 5.01        | 0.52        |
|                                   | BLYP       | 8.04        | 8.23        | 5.66        | 11.23        | 8.60        | 5.00        | 0.48        |
|                                   | BP86       | 8.25        | 8.30        | 5.73        | 11.48        | 8.80        | 5.14        | 0.59        |
|                                   | BPBE       | 8.05        | 8.03        | 5.46        | 11.31        | 8.71        | 5.01        | 0.51        |
|                                   | M06L       | 7.76        | 7.72        | 5.85        | 11.07        | 8.52        | 4.85        | 0.40        |
|                                   | PBE        | 8.31        | 8.27        | 5.74        | 11.53        | 8.88        | 5.18        | 0.63        |
|                                   | TPSS       | 7.66        | 7.85        | 5.39        | 10.89        | 8.29        | 4.74        | 0.42        |
| Double Hybrid Functional          | DSD-PBEP86 | 7.11        | 7.49        | 5.21        | 10.76        | 8.32        | 3.29        | 0.43        |

<sup>1</sup>:  $\sigma = \sqrt{\frac{\sum (x_i - x_{\text{exp}})^2}{n}}$ ,  $x_i$  is the DFT calculated bond dissociation energy and  $x_{\text{exp}}$  is the experimental value.

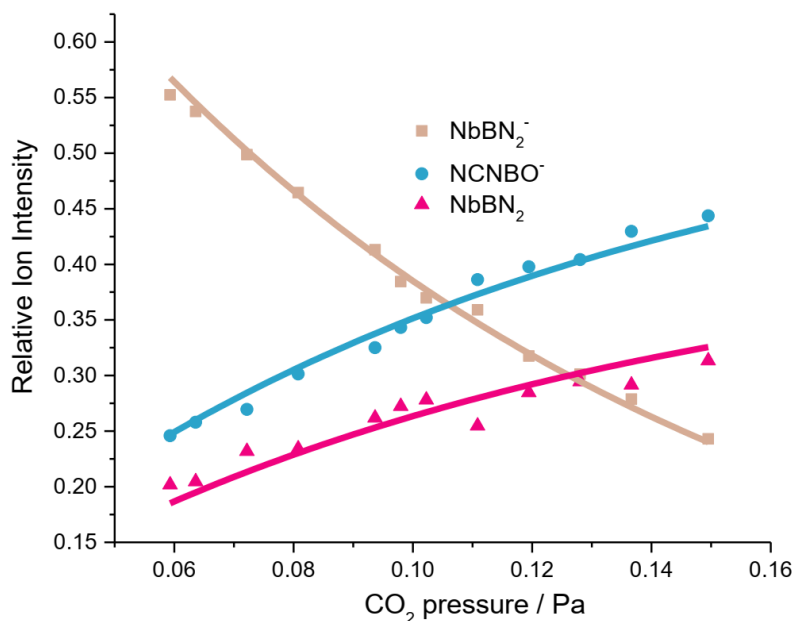

**Fig. S1** Variations of the relative intensities of the reactant and product cations in the reaction of NbBN<sub>2</sub><sup>-</sup> and CO<sub>2</sub> with respect to the CO<sub>2</sub> pressures for 0.9 ms. The solid lines are fitted to the experimental data points by using the equations derived with the approximation of the pseudo-first-order reaction mechanism.

The pseudo-first-order rate constants ( $k_1$ ) for the reactions between cluster ions and reactant molecules can be estimated by this equation.

$$\ln \frac{I_R}{I_T} = -k_1 \frac{P_{\text{effective}}}{kT} t_R$$

in which  $I_R$  is the intensity of the reactant cluster ions after the reaction,  $I_T$  is the total ion intensity including product ion contribution,  $P_{\text{effective}}$  is the effective pressure,  $t_R$  is the reaction time,  $k$  is the Boltzmann constant, and  $T$  is the temperature ( $\approx 298$  K). The R value for Fig. S1 is 0.98.

The fitted pseudo-first-order rate constant ( $k_1$ ) of Reactions 1a and b were estimated to be  $(3.7 \pm 0.7) \times 10^{-12} \text{ cm}^3 \text{ molecule}^{-1} \text{ s}^{-1}$ . The errors of  $t_R$  ( $\pm 5\%$ ),  $T$  ( $\pm 2\%$ ), and  $P$  ( $\pm 20\%$ ) were taken into account to estimate the error for rate constant.

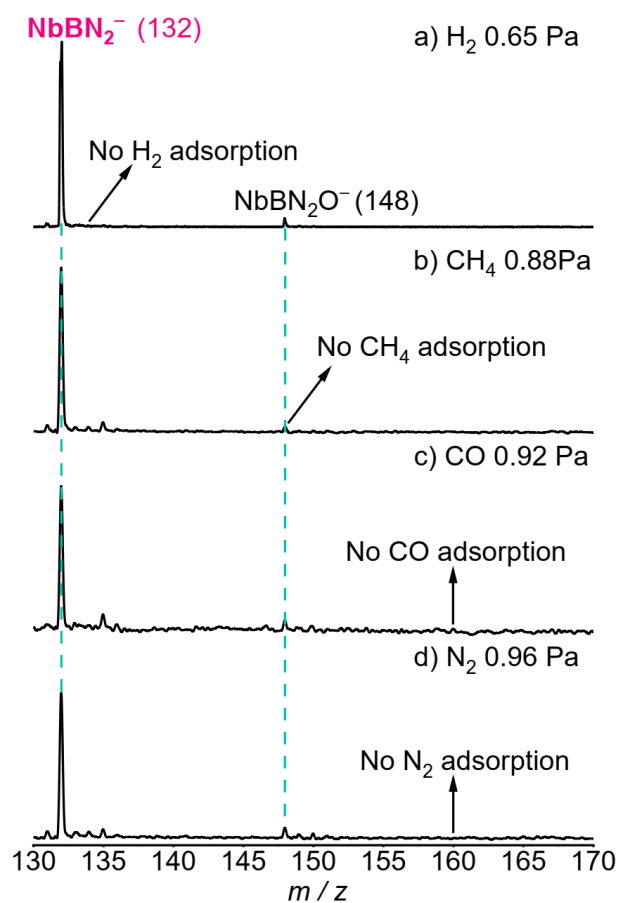

**Fig. S2** Time-of-flight (TOF) mass spectra for the reactions of the mass-selected  $\text{NbBN}_2^-$  with (a)  $\text{H}_2$ , (b)  $\text{CH}_4$ , (c)  $\text{CO}$  and (d)  $\text{N}_2$ . The effective reactant gas pressures are shown.

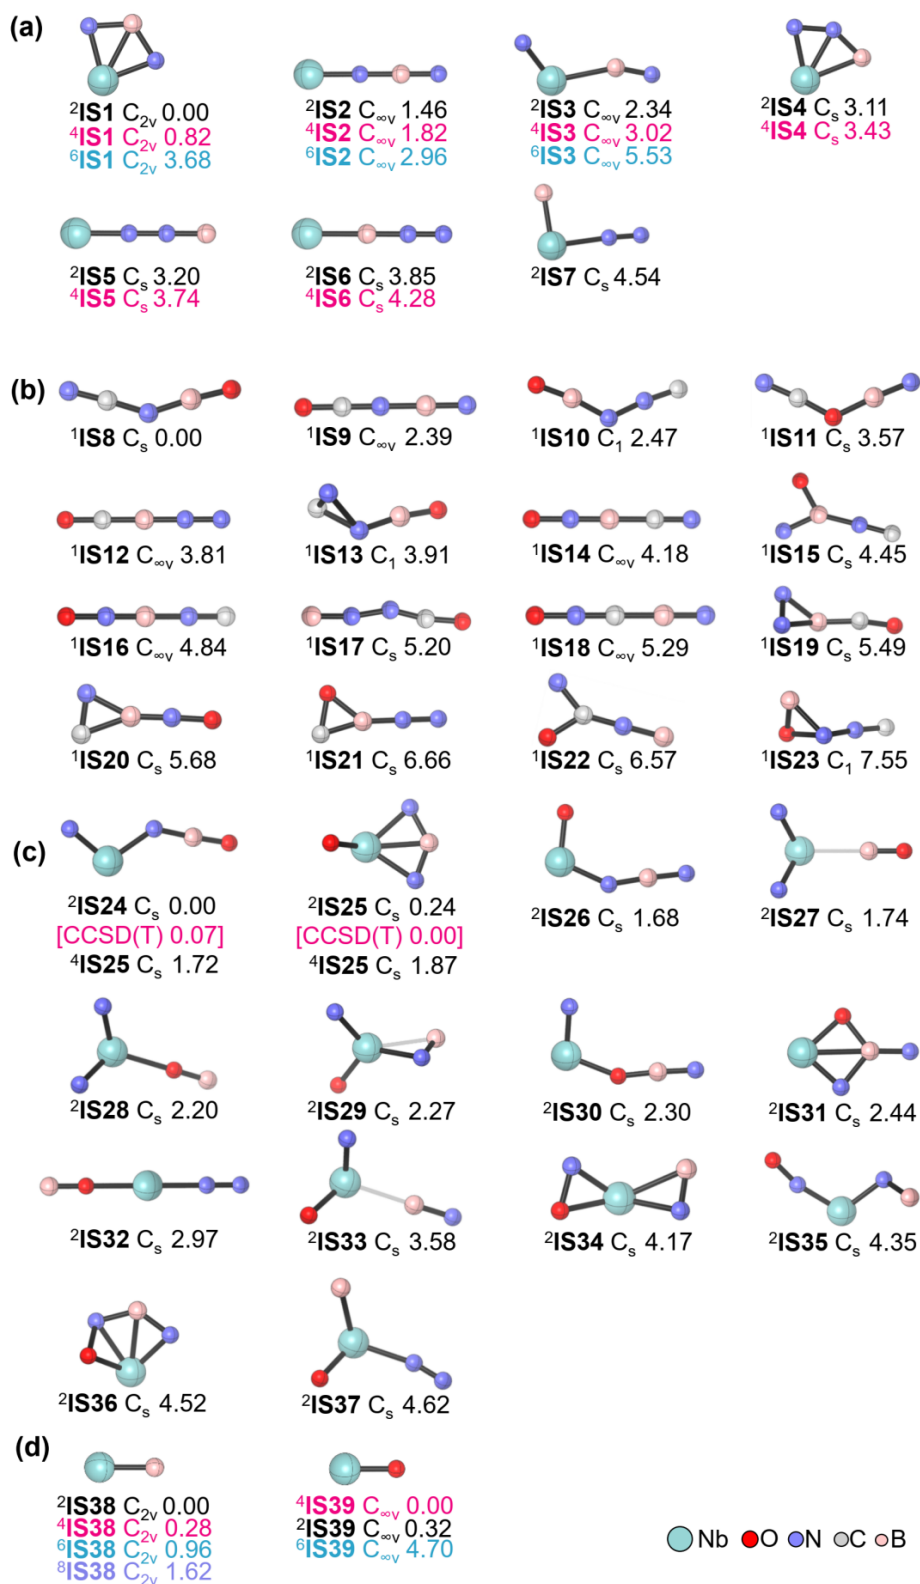

**Fig. S3** DFT-calculated structures and relative energies of (a)  $\text{NbBN}_2^-$ , (b)  $\text{NCNBO}^-$ , (c)  $\text{NbBN}_2\text{O}^-$  and (d)  $\text{NbB}^-$ ,  $\text{NbO}^-$ . In panel c, CCSD(T)-calculated structures and relative energies of (c)  $^2\text{IS24}$  and  $^2\text{IS25}$  are given parentheses. The point group is given under each structure and the superscripts indicate the spin multiplicities. The zero-point vibration corrected energies ( $\Delta H_{0K}$  in eV) of each structure are given.



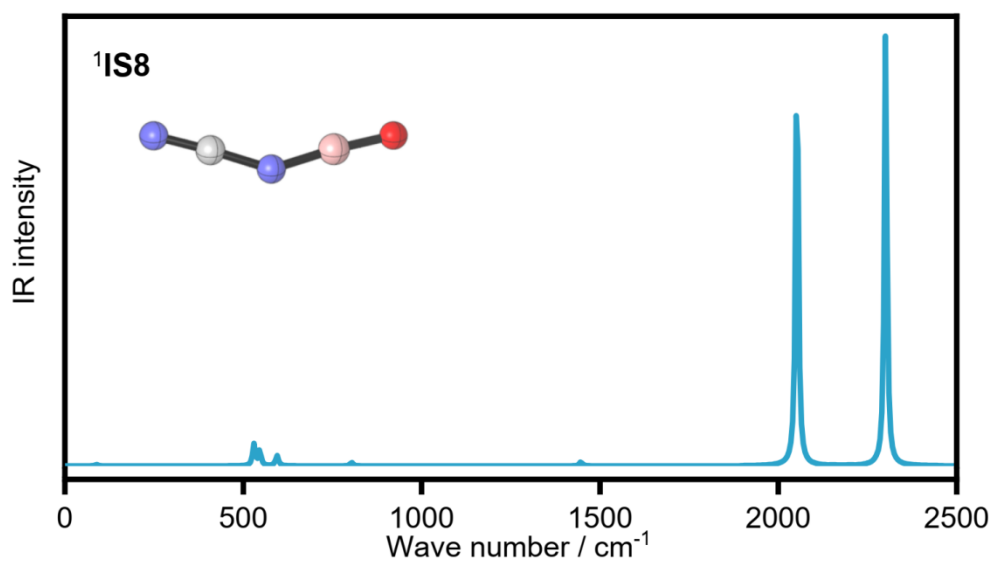

**Fig. S5** The calculated infrared spectrum of  $\text{NCNBO}^-$  ( $^1\text{IS8}$ ).

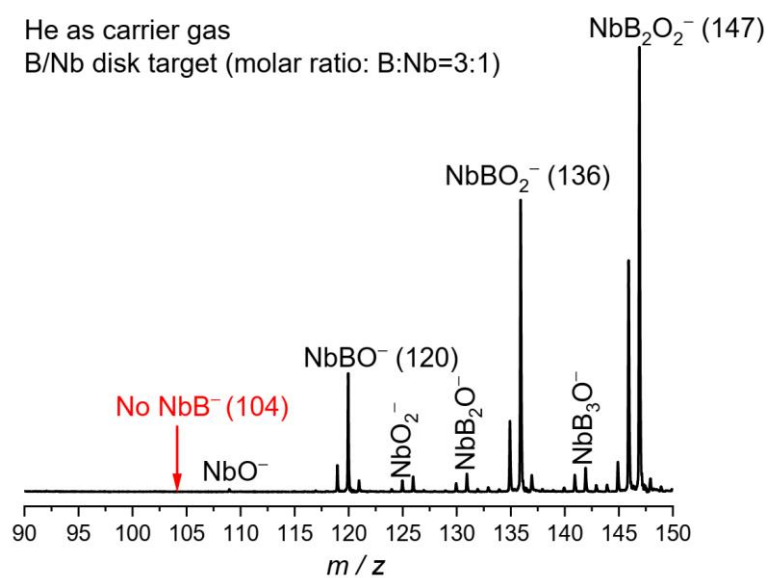

**Fig. S6** The full generation spectrum of  $\text{NbB}_x\text{O}_y^-$ . No  $\text{NbB}^-$  anions were generated.

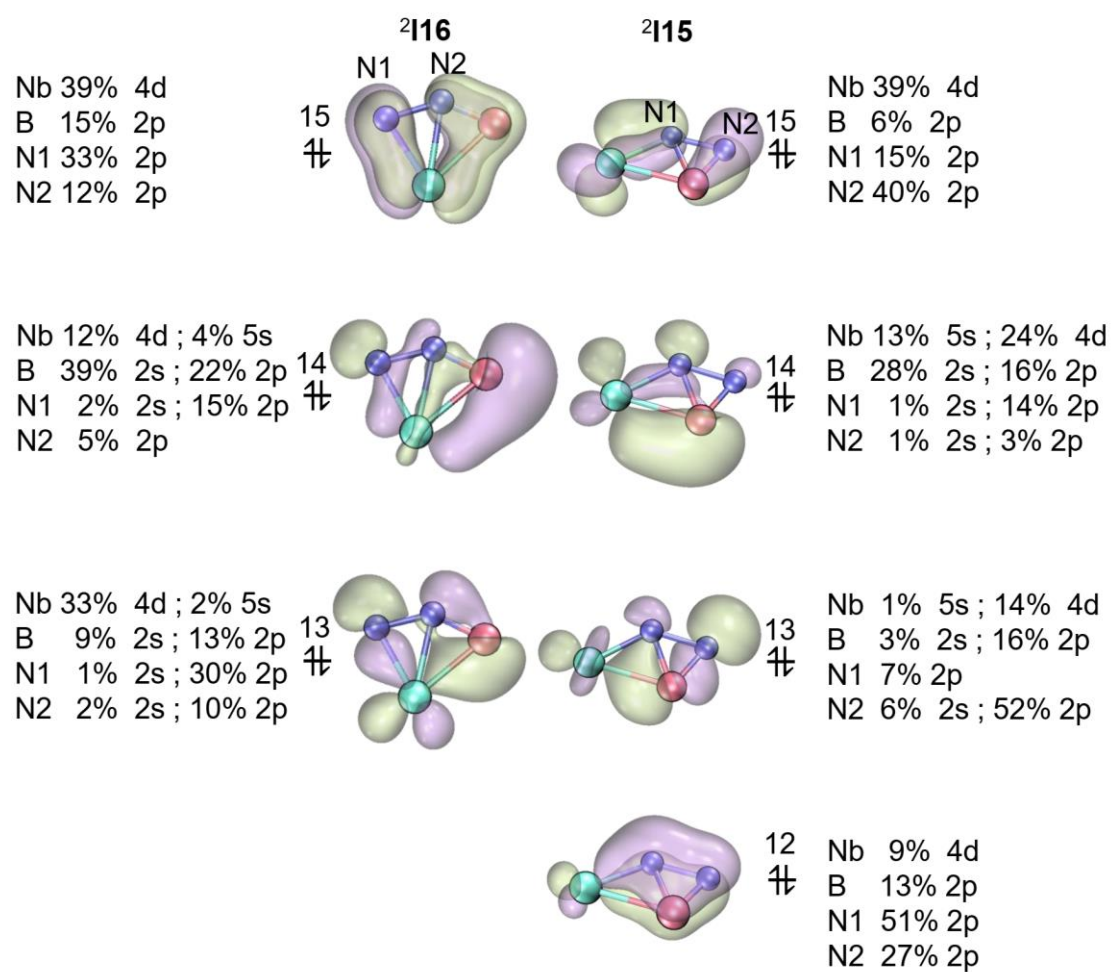

**Fig. S7** Schematic molecular orbital diagrams for (a)  $^2\text{I16}$  and (b)  $^2\text{I15}$ . The compositions of some key molecular orbitals are given. Natural orbital partial occupation numbers are given.



## REFERENCES

- 1 Y. Sun, L. Hu and H. Chen, *J. Chem. Theory. Comput.*, 2015, **11**, 1428-1438.
- 2 L. Hu and H. Chen, *J. Chem. Theory. Comput.*, 2015, **11**, 4601-4614.
- 3 S. K. Gupta and K. A. Gingerich, *J. Chem. Phys.*, 1981, **74**, 3584-3590.
- 4 C. Angeli, R. Cimiraglia, S. Evangelisti, T. Leininger and J. P. Malrieu, *J. Chem. Phys.* 2001, **114**, 10252-10264.
- 5 R. R. Reddy, Y. N. Ahammed, K. R. Gopal, P. A. Azeem and S. Anjaneyulu, *Astrophys. Space Sci.*, 1998, **262**, 223–240.
